# Supplementary material for: A negative polaron resistant p-type host for extended lifetime in deep blue phosphorescent organic light-emitting diodes
Source: Royal Society of Chemistry journal article supplement (doi:10.1039/c9tc06702g), 2020-01-01
Supplement: c9tc06702g1.pdf [file c9tc06702g1.pdf]

## Supporting information

### **Negative polaron resistant p-type host for extended lifetime in deep blue phosphorescent organic light-emitting diodes**

Chang Yoon Yang, Won Jae Chung, Jun Yeob Lee\*

School of Chemical Engineering, Sungkyunkwan University  
2066, Seobu-ro, Jangan-gu, Seobu-ro, Suwon, Gyeonggi, 16419, Korea  
E-mail : [leej17@skku.edu](mailto:leej17@skku.edu)

## Experimental

### General information

All chemicals and reagents were purchased from commercial suppliers. 9H-3,9'-bicarbazole was purchased from Sunfine global Co. Ltd. and sublimed before use. Bromo benzene and 2-fluorobenzonitrile were purchased from TCI Co. Cesium carbonate used as a base was purchased from Samchun Chem. Toluene, tetrahydrofuran, *n*-hexane, and methylene chloride were products of Samchun pure chemical Co. Ltd.. *N,N*-dimethylformamide (DMF) was purchased from Daejung Chemical & Metal Co.. All reactions and manipulations were performed in the oil bath. All column chromatography (methylene chloride (MC)/*n*-hexane (HEX) mixed solvent) was carried out on a stationary phase of the column on silica gel. All materials were purified by vacuum sublimation in order to get purity higher than 99.9 % before the device test.

The HOMO and LUMO were estimated and calculated using cyclic voltammetry (Ivium Tech., Iviumstat). The UV-vis spectra were observed using UV-vis spectrophotometer (JASCO, V-730) and the PL spectra were obtained using a fluorescence spectrophotometer (PerkinElmer, LS-55). UV-vis analysis was performed using a tetrahydrofuran solution of the sample and PL measurements at room temperature was performed using a toluene solution of the sample. The triplet energy of the material was measured after 2 ms delay time at 77 K using a frozen tetrahydrofuran solution in liquid nitrogen. The tetrahydrofuran and toluene were distilled over sodium and calcium hydride.

The <sup>1</sup>H and <sup>13</sup>C nuclear magnetic resonance (NMR) spectra were recorded with a Unity Inova (Varian, 500 MHz) spectrometer. Solvent for the NMR analysis was chloroform (CDCl<sub>3</sub>) and dimethyl sulfoxide(DMSO-d<sub>6</sub>). The equipment to measure mass spectra was Advion, Expression<sup>L</sup> CMS spectrometer in APCI mode. Purity of the material was analyzed using high performance liquid chromatography (Younglin Instrument Co.) using a mobile phase of acrylonitrile: methylalcohol(9:1).

## Synthesis

### 9-Phenyl-9H-3,9'-bicarbazole(CzPh)

CzPh was synthesized in the same way as the reference<sup>1</sup>.

## References

1. Yoshizaki, Kei; Ogiwara, Toshinari; Kawamura, Yuichiro; Yasukawa, Keiichi; Yoshida, Kei 'Organic electroluminescent element and electronic device', Idemitsu Kosan Co.,Ltd., Japan, 2019.

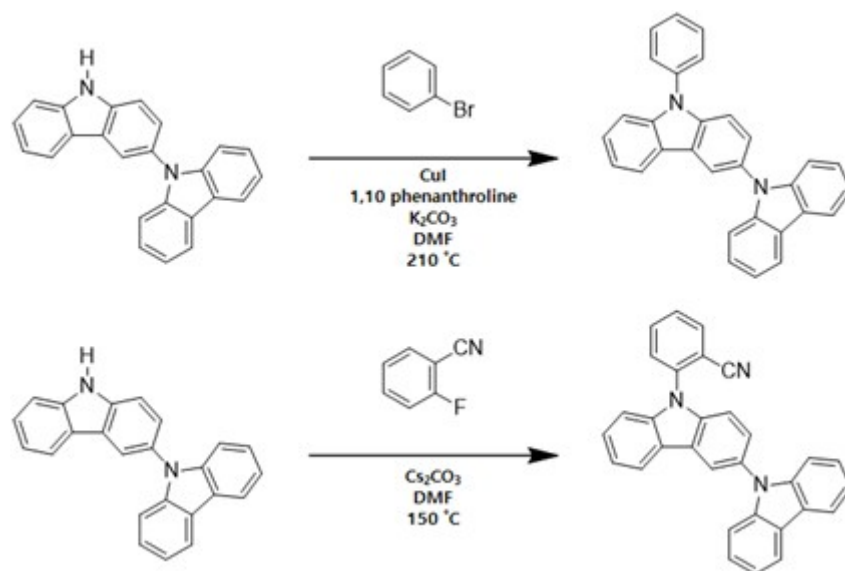

Scheme S1. Synthetic route to CzBN and oCzBN

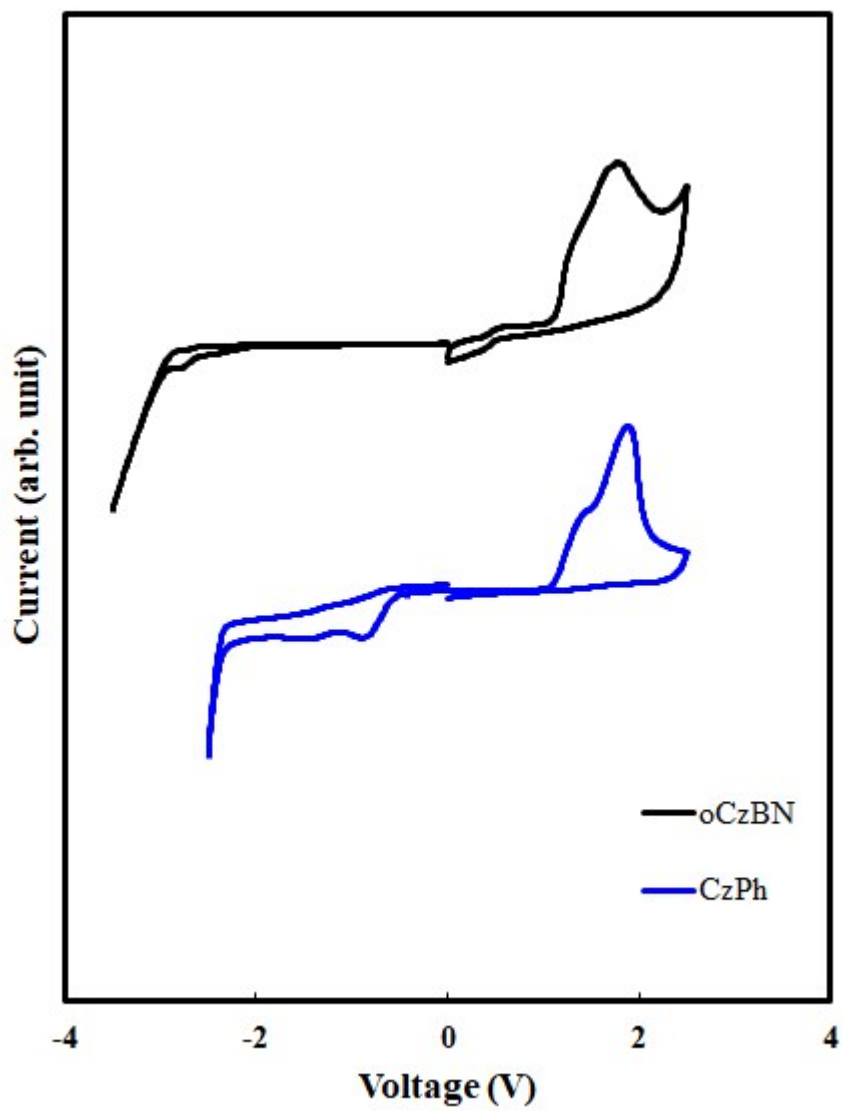

**Figure S1.** Cyclic voltammetry (CV) data of the hosts.

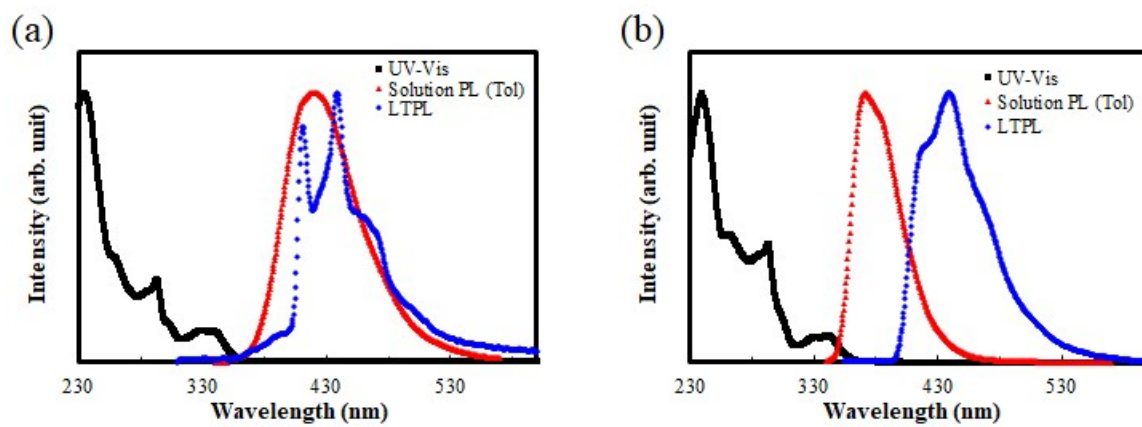

**Figure S2.** (a) Photophysical properties of oCzBN (b) Photophysical properties of CzPh

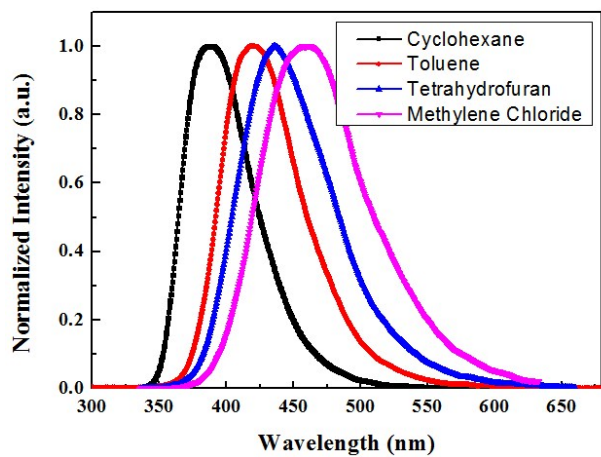

**Figure S3.** PL spectra of the oCzBN host at different solvents.

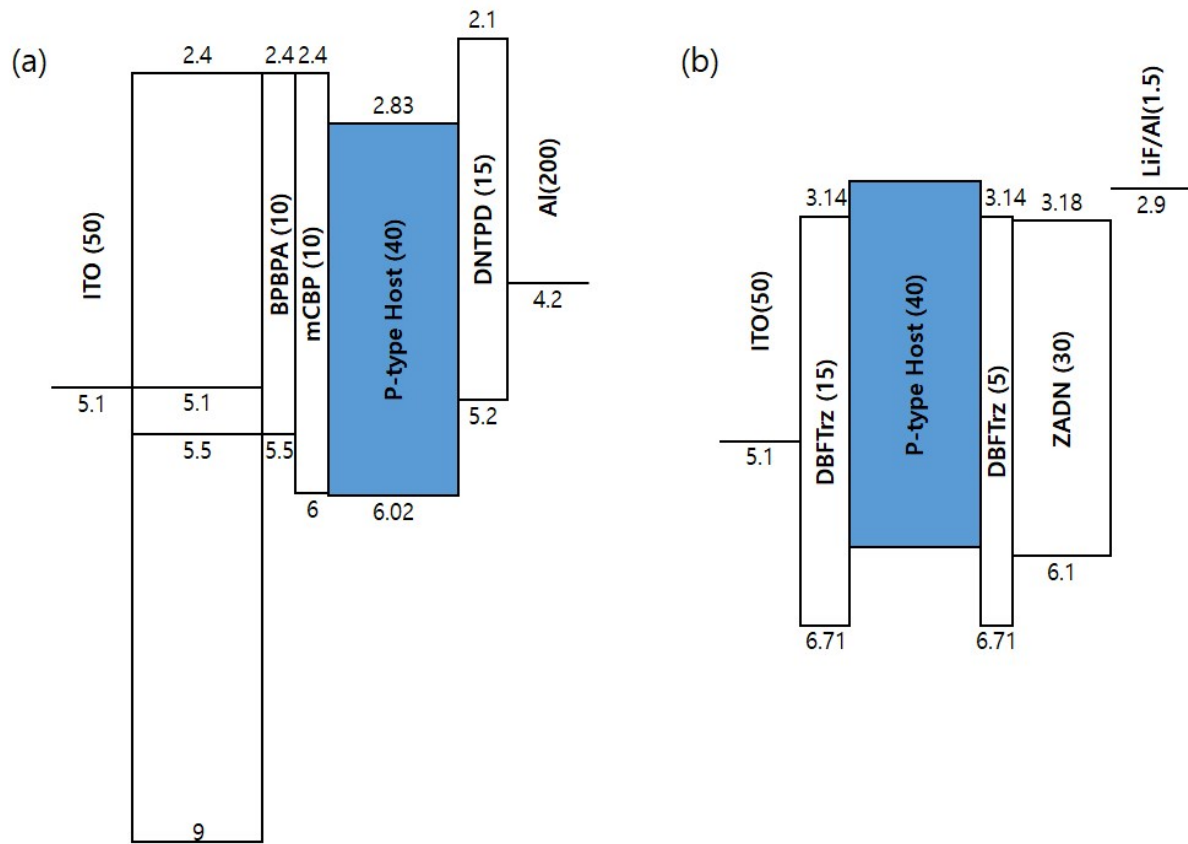

**Figure S4.** (a) HOD and (b) EOD device structures

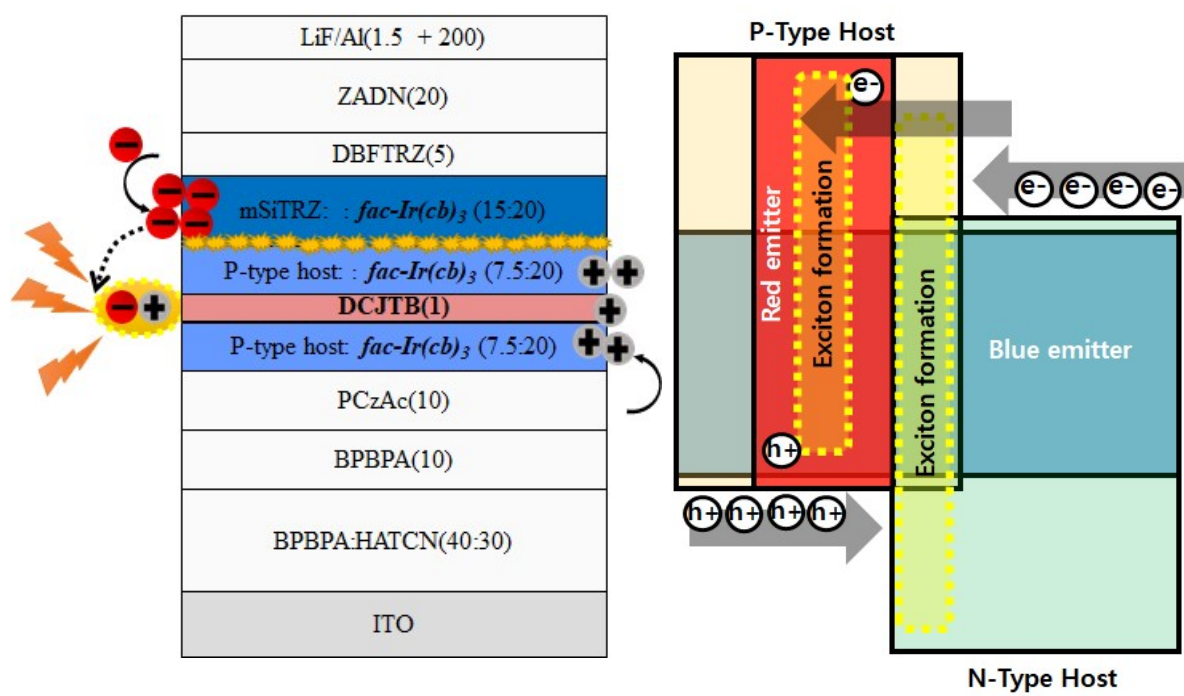

**Figure S5.** The device structure for the electron leakage test
